# Supplementary material for: Genome-Wide Analysis of the Soybean Calmodulin-Binding Protein 60 Family and Identification of GmCBP60A-1 Responses to Drought and Salt Stresses
Source: MDPI journal article supplement (doi:10.3390/ijms222413501), 2021-12-16
Supplement: s1 [file s1]

**Table S1.** The values of expression patterns of GmCBP60 genes identified in the soybean genome under different treatments.

| Gene ID      | Gene Name  | CK <sup>1</sup> -FPKM <sup>2</sup> | Drought <sup>3</sup> -FPKM | Salt <sup>4</sup> -FPKM |
|--------------|------------|------------------------------------|----------------------------|-------------------------|
| LOC100804548 | CBP60A-1   | 5.825                              | 42.395                     | 26.365                  |
| LOC100793156 | CBP60A-2   | 12.63                              | 39.935                     | 36.03                   |
| LOC100797598 | CBP60B-1   | 0.35                               | 28.045                     | 14.63                   |
| LOC100812605 | CBP60B-2   | 8.36                               | 75.205                     | 27.19                   |
| LOC100806393 | CBP60B-3   | 2.555                              | 12.22                      | 4.515                   |
| LOC100790087 | CBP60B-4   | 31.16                              | 26.12                      | 28.865                  |
| LOC100803029 | CBP60B-5   | 27.12                              | 59.04                      | 35.89                   |
| LOC100798493 | CBP60B-6   | 0.345                              | 1.37                       | 0.5                     |
| LOC100802994 | CBP60C-1   | 8.915                              | 28.275                     | 14.315                  |
| LOC100816427 | CBP60D-1   | 0.375                              | 77.565                     | 17.205                  |
| LOC100805759 | CBP60D-2   | 0.41                               | 83.32                      | 10.075                  |
| LOC102664843 | CBP60E-1   | 1.805                              | 13.58                      | 5.23                    |
| LOC100808358 | CBP60E-2   | 1.345                              | 8.475                      | 5.025                   |
| LOC100775528 | CBP60E-3   | 2.9                                | 35.465                     | 17.035                  |
| LOC100806598 | CBP60G-1   | 0.075                              | 6.435                      | 2.775                   |
| LOC100792405 | SARD1-1    | 0.075                              | 2.71                       | 0.765                   |
| LOC100788183 | SARD1-2    | 1.59                               | 108.685                    | 14.93                   |
| LOC100803213 | SARD1-3    | 0.265                              | 32.95                      | 6.43                    |
| LOC100802257 | SARD1-like | 0.675                              | 254.035                    | 12.89                   |

<sup>1</sup> CK: control check.

<sup>2</sup> FPKM: fragments per kilobase of transcript per million mapped reads.

<sup>3</sup> Drought: drought treatment.

<sup>4</sup> Salt: salt treatment.

**Table S2.** The primers and sequences used for the experiments. The restriction sites were underline.

| Primer Name  | Primer Sequence            |
|--------------|----------------------------|
| CBP60A-1-F   | GTCGTGGTTTCCCTTGCCC        |
| CBP60A-1-R   | CATTGTCCGAGTTTGTGTTGCG     |
| CBP60A-2-F   | TCTGTGACACTGATTCAATGGCT    |
| CBP60A-2-R   | CCTGTATTTGGTTTCCTCGTTT     |
| CBP60B-1-F   | TGTGCTTCGTGAATAAACTCCC     |
| CBP60B-1-R   | GCCCCTTCCCCTCTCTTGGT       |
| CBP60B-2-F   | TGTTGAAGCCCTGAAGGTTGAC     |
| CBP60B-2-R   | GCCTTCTATCCGCTTTGGG        |
| CBP60B-3-F   | GACCTGCGTTGGCTAGTGTA       |
| CBP60B-3-R   | GCCATCAGGGCCTTCTATCC       |
| CBP60B-4-F   | ATCAGCCCCGAACGAAAGAGG      |
| CBP60B-4-R   | AAGAGACAGCCGGGACCTAA       |
| CBP60B-5-F   | GAGTTTCGTCTTTTCGGGCG       |
| CBP60B-5-R   | TTGCGTCGGTTGTTGGTTTC       |
| CBP60B-6-F   | GAGGGTGATGAAAGGGGTGTT      |
| CBP60B-6-R   | GATAGGGTTTGGTTCCCGATA      |
| CBP60C-1-F   | TACACGACAACCAGCCACTC       |
| CBP60C-1-R   | ATGAGATTGCCCTCCTCCCA       |
| CBP60D-1-F   | CTTGAGTTGTTCAATTTGCTTTGTAA |
| CBP60D-1-R   | GCCACTGATTGATGCTTGTTTT     |
| CBP60D-2-F   | AGGCAGTGGCAAAGTTCCAA       |
| CBP60D-2-R   | TTTGTTCCACCACCTCGCTT       |
| CBP60E-1-F   | GAATGCAAACCTCCAAGACCAA     |
| CBP60E-1-R   | CAGAACTCACCATCAAGGACACA    |
| CBP60E-2-F   | AGAAATGCTCAAGGTTTGGAAGA    |
| CBP60E-2-R   | CCTGGTCCTCGCTGAATGAA       |
| CBP60E-3-F   | GACATTCAACGAGGATCAGGGA     |
| CBP60E-3-R   | TCCAAAAGCAATATCAGCAAGC     |
| CBP60G-1-F   | GCTCTTACCACTTAGTTTGCGTTA   |
| CBP60G-1-R   | TGACCTCTACCATCAGCACCCCT    |
| GmAnnexin1-F | AGGTTGGGGAACCTAACGAGG      |
| GmAnnexin1-R | GTGTCCAAAGATGAACCAGCC      |
| GmCAX3-F     | TATTTCTGCACACCAAGGCT       |
| GmCAX3-R     | AAGACGTGGAGGACATGCTG       |
| GmCBL4-F     | TAGGTTGTATGATCTGAGGCAG     |
| GmCBL4-R     | TGACTCTTCAATATCCGTTCTGT    |
| GmCIPK24-F   | GGTGTGTTGAAGTTGCGCCAT      |
| GmCIPK24-R   | GCTTTCAGCCTTTCAGTGCT       |
| GmDREB2-F    | GAAAGCAGCAGCACCAACAA       |
| GmDREB2-R    | GGCGTAAGAACCCAACCAGA       |
| GmERD1-F     | CGTCCAGAATTGCTCAACAG       |
| GmERD1-R     | TGGGGTTATAGCCTTGTTGG       |

**Table S2.** The primers and sequences used for the experiments. The restriction sites were underline.

| Primer Name     | Primer Sequence                                                                                                                                                                                                                                                                                                                                                                                                                                                                                                                                                                                                                                                                                           |
|-----------------|-----------------------------------------------------------------------------------------------------------------------------------------------------------------------------------------------------------------------------------------------------------------------------------------------------------------------------------------------------------------------------------------------------------------------------------------------------------------------------------------------------------------------------------------------------------------------------------------------------------------------------------------------------------------------------------------------------------|
| GmMYB118-F      | TTGCTTGAGATTATGGTCCTTG                                                                                                                                                                                                                                                                                                                                                                                                                                                                                                                                                                                                                                                                                    |
| GmMYB118-R      | CATCACCTTTTCCTTCAACC                                                                                                                                                                                                                                                                                                                                                                                                                                                                                                                                                                                                                                                                                      |
| GmMYB174-F      | TGGCATAAAATAGGGAGCTGA                                                                                                                                                                                                                                                                                                                                                                                                                                                                                                                                                                                                                                                                                     |
| GmMYB174-R      | AAAAGGCAAGTTCACGGATT                                                                                                                                                                                                                                                                                                                                                                                                                                                                                                                                                                                                                                                                                      |
| GmNAC11-F       | TGCAAGGAGGAGCACAAGAG                                                                                                                                                                                                                                                                                                                                                                                                                                                                                                                                                                                                                                                                                      |
| GmNAC11-R       | CACAGAACCCAGTCGTCCAA                                                                                                                                                                                                                                                                                                                                                                                                                                                                                                                                                                                                                                                                                      |
| GmNHX1-F        | GGGTAGTGAGAACGCTGTG                                                                                                                                                                                                                                                                                                                                                                                                                                                                                                                                                                                                                                                                                       |
| GmNHX1-R        | ATTGTGAGATGTTTGCTGGTAATC                                                                                                                                                                                                                                                                                                                                                                                                                                                                                                                                                                                                                                                                                  |
| GmRD20A-F       | GTGGCACATGACTGAAGGAA                                                                                                                                                                                                                                                                                                                                                                                                                                                                                                                                                                                                                                                                                      |
| GmRD20A-R       | ATCTTTCCAGCAGCACCTCT                                                                                                                                                                                                                                                                                                                                                                                                                                                                                                                                                                                                                                                                                      |
| GmSOS1-F        | TTGTGCTGCATTTCTTCGAG                                                                                                                                                                                                                                                                                                                                                                                                                                                                                                                                                                                                                                                                                      |
| GmSOS1-R        | CGTGCTTCTTCTCCTTCCAC                                                                                                                                                                                                                                                                                                                                                                                                                                                                                                                                                                                                                                                                                      |
| SARD1-1-F       | TTGCACCAATCGGGGACATT                                                                                                                                                                                                                                                                                                                                                                                                                                                                                                                                                                                                                                                                                      |
| SARD1-1-R       | GATCCTTGACAGCAAACGCC                                                                                                                                                                                                                                                                                                                                                                                                                                                                                                                                                                                                                                                                                      |
| SARD1-2-F       | CAAGACAACAATAATAAGCCACCA                                                                                                                                                                                                                                                                                                                                                                                                                                                                                                                                                                                                                                                                                  |
| SARD1-2-R       | GCACACTAAAATGCCTCATCACTC                                                                                                                                                                                                                                                                                                                                                                                                                                                                                                                                                                                                                                                                                  |
| SARD1-3-F       | CTGGCGGAAAACGGATGA                                                                                                                                                                                                                                                                                                                                                                                                                                                                                                                                                                                                                                                                                        |
| SARD1-3-R       | CAAAGTTGAAGGTTGTTGCTGAT                                                                                                                                                                                                                                                                                                                                                                                                                                                                                                                                                                                                                                                                                   |
| SARD1-like-F    | TTCAGAGTTGCTGTTAGGGTGG                                                                                                                                                                                                                                                                                                                                                                                                                                                                                                                                                                                                                                                                                    |
| SARD1-like-R    | CGTCATTGAGCTTAGGTGGGT                                                                                                                                                                                                                                                                                                                                                                                                                                                                                                                                                                                                                                                                                     |
| Soby Actin-RT-F | ACATTGTTCTTAGTGGTGGCT                                                                                                                                                                                                                                                                                                                                                                                                                                                                                                                                                                                                                                                                                     |
| Soby Actin-RT-R | CTGTTGGAAGGTGCTGAG                                                                                                                                                                                                                                                                                                                                                                                                                                                                                                                                                                                                                                                                                        |
| CBP60A1-1302-F  | <u>GGGACTCTTG</u> ACCATGATGTCGCTCAAGCGCCCC                                                                                                                                                                                                                                                                                                                                                                                                                                                                                                                                                                                                                                                                |
| CBP60A1-1302-R  | <u>TCAGATCTACCC</u> ATGGTCACAACCTTACCTGTATTTGA                                                                                                                                                                                                                                                                                                                                                                                                                                                                                                                                                                                                                                                            |
| CBP60A1-3301-F  | <u>GGACTCTTG</u> ACCATGATGTCGCTCAAGCGCCCC                                                                                                                                                                                                                                                                                                                                                                                                                                                                                                                                                                                                                                                                 |
| CBP60A1-3301-R  | <u>ATTCGAGCTGGT</u> CACCTCACAACCTTACCTGTATTTGA                                                                                                                                                                                                                                                                                                                                                                                                                                                                                                                                                                                                                                                            |
| CBP60A1-16318-F | <u>TATCTCTAGAG</u> GGATCCATGTCGCTCAAGCGCCCC                                                                                                                                                                                                                                                                                                                                                                                                                                                                                                                                                                                                                                                               |
| CBP60A1-16318-R | <u>TGCTCACC</u> ATGGATCCCAACCTTACCTGTATTTGA<br>CTCCGCATCGTCGACCTCATCGGAAACCGCCTCTCCGGC<br>TCCATTCCCGCCGGCATCGGCAGACTCCATCGGCTCACG<br>GTGCTCAACGTCGCCGACAATCTCATCTCCGGAACAATC<br>CCAACCTCGCTGGCGAACCTCAGCAGTCTCATGCACTTG<br>GATCTCCGAAACAACCTCTTCT <u>CCGGGCCCATTCCAAGA</u><br><u>AAC</u> TCGATCCGATCGAAAAACGGGAGTCTGCCCTAA<br><u>GACAGATAAGCCGCCAAGAAGGCGCAAGTCAACCGCGA</u><br><u>GTTGTTGTATCATATCTACTGACAAAGATCACA</u> AATGGG<br><u>ATGGCTGATTAGATACCTTGGCCTCCCAGATCGATT</u> CGA<br>AGTTTCTTGGAATGGGCCCCGAGAAGAGGTTGTTTCGGA<br>GATCCAAGTGCATGAGACTGCTGAGGTTCCGCCAGCGAGG<br>TTGGGATTGTTCCGGAGATGAGATTGTCGGCGACGTTGA<br>GCACCGTGAGCCGATGGAGTCTGCCGATGCCGGCGGGAA<br>TGGAGCCGGAGAGGCGGTTTCCGATGAGGTCGACGATGC |

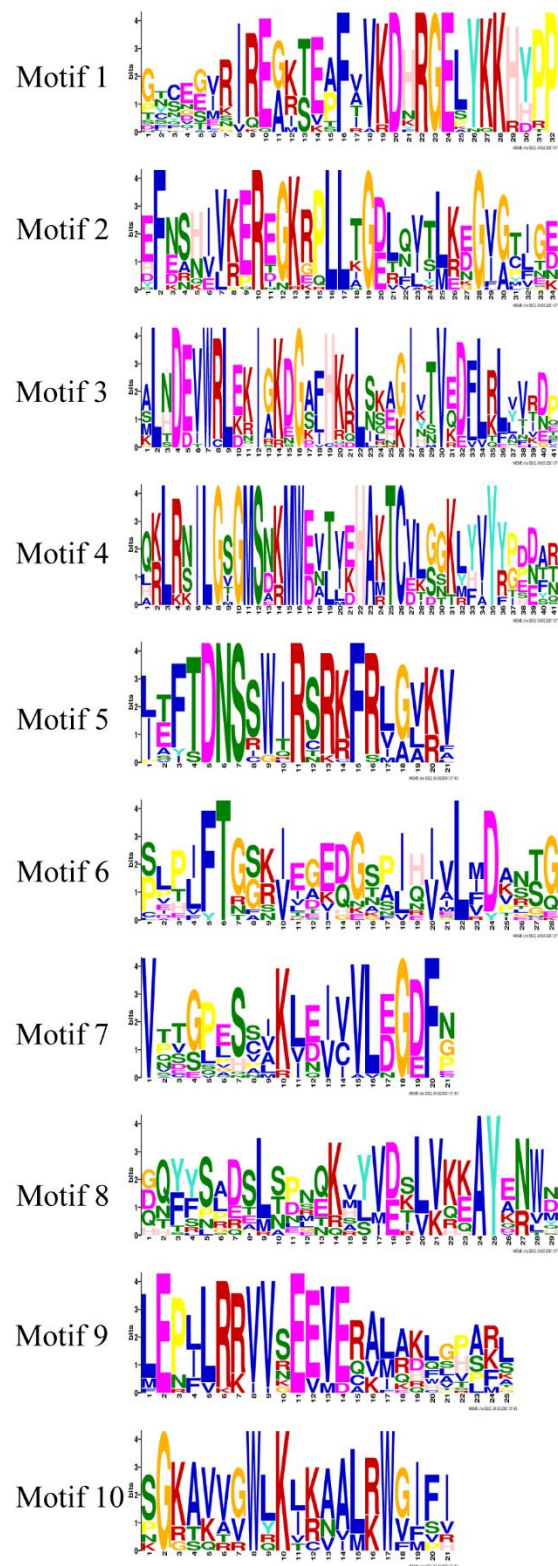

**Figure S1.** Sequence logo of global multiple alignment of GmCBP60s proteins by MEME program.

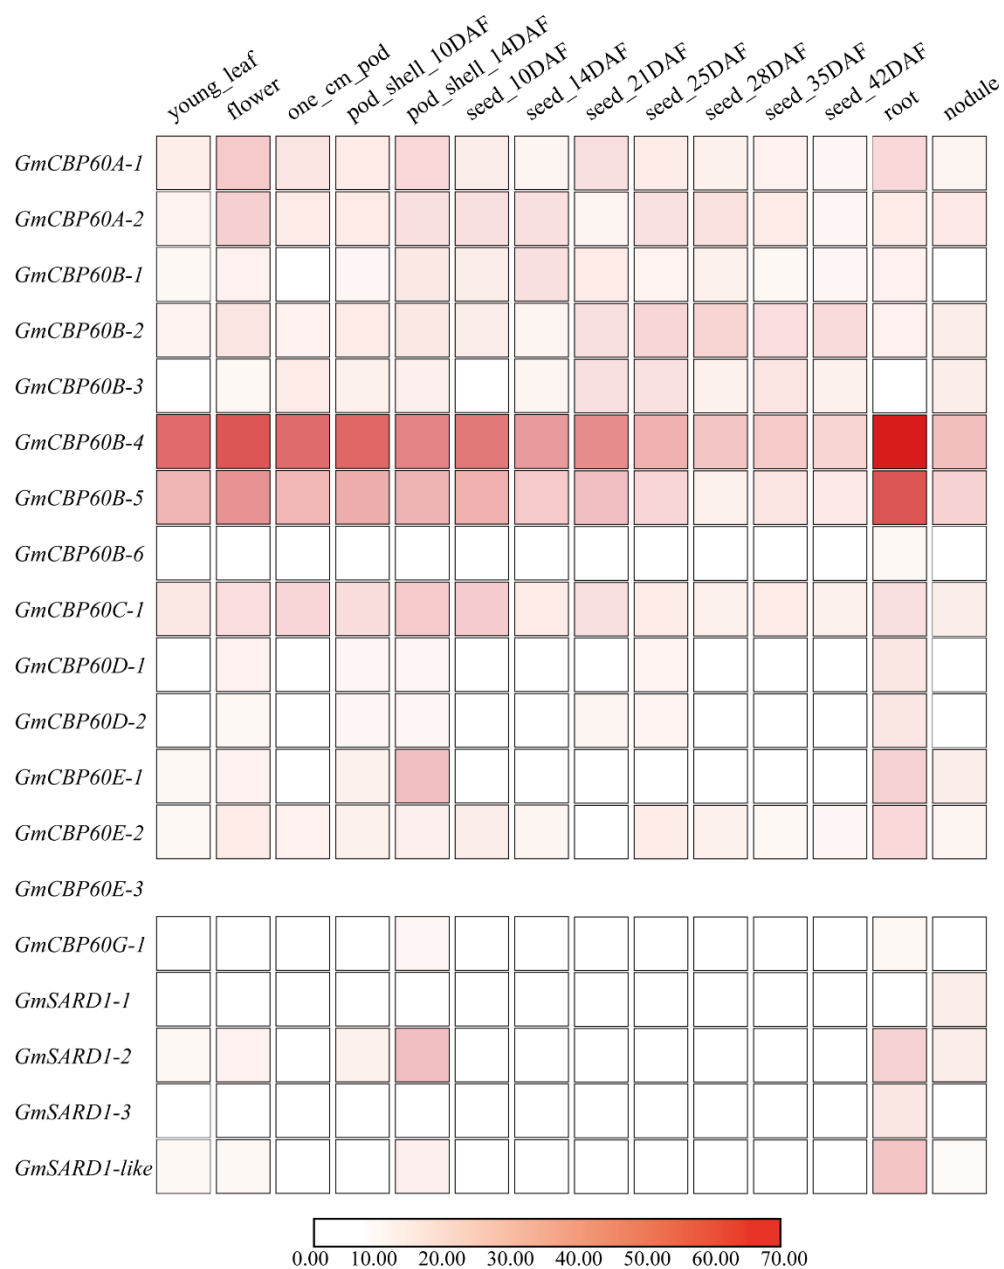

**Figure S2.** Quantified prediction of tissue expression in soybean. The deeper color signifies stronger expression.

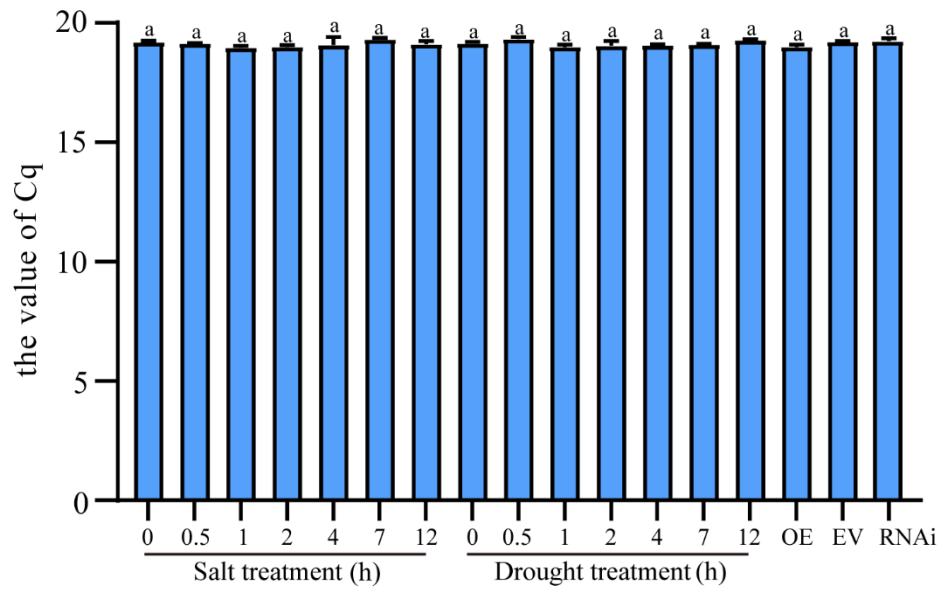

|               | 1        | 2        | 3        | 4        | 5        | 6        | 7        | 8        | 9        | AVERAGE  |
|---------------|----------|----------|----------|----------|----------|----------|----------|----------|----------|----------|
| Salt-0 h      | 19.11131 | 19.11162 | 19.11157 | 19.25015 | 19.25940 | 19.25991 | 19.19152 | 19.20901 | 19.20310 | 19.18973 |
| Salt-0.5 h    | 19.10836 | 19.11186 | 19.12801 | 19.15215 | 19.15226 | 19.15884 | 19.13627 | 19.13648 | 19.13759 | 19.13576 |
| Salt-1 h      | 18.94419 | 19.09956 | 18.88718 | 19.00223 | 19.01590 | 19.01100 | 18.90250 | 18.91040 | 18.91568 | 18.96540 |
| Salt-2 h      | 18.93865 | 18.90521 | 18.99986 | 19.10253 | 19.10359 | 19.10339 | 18.92110 | 18.92570 | 18.93010 | 18.99224 |
| Salt-4 h      | 18.89975 | 18.89851 | 18.89746 | 19.03507 | 19.01576 | 19.09888 | 18.95420 | 18.92113 | 19.93962 | 19.07338 |
| Salt-7 h      | 19.34762 | 19.24284 | 19.29196 | 19.38387 | 19.40721 | 19.38353 | 19.25692 | 19.25066 | 19.26197 | 19.31406 |
| Salt-12 h     | 19.14933 | 19.16662 | 18.92677 | 18.92173 | 19.06099 | 19.08506 | 19.22160 | 19.20189 | 19.26786 | 19.11132 |
| Drought-0 h   | 19.16285 | 19.16639 | 19.16877 | 19.20483 | 19.20116 | 19.20457 | 19.02684 | 19.05685 | 19.05489 | 19.13857 |
| Drought-0.5 h | 19.31050 | 19.35873 | 19.46529 | 19.35187 | 19.35926 | 19.35489 | 19.22156 | 19.21054 | 19.21891 | 19.31684 |
| Drought-1 h   | 18.96093 | 18.92990 | 18.93927 | 19.11565 | 19.11893 | 19.11056 | 18.92568 | 18.93847 | 18.93025 | 18.99663 |
| Drought-2 h   | 18.97697 | 18.97697 | 18.79666 | 19.15329 | 19.15698 | 19.49963 | 18.92634 | 18.92648 | 18.92889 | 19.03802 |
| Drought-4 h   | 19.05083 | 19.04780 | 19.05648 | 19.12686 | 19.12657 | 19.12444 | 19.00363 | 18.99863 | 18.98563 | 19.05787 |
| Drought-7 h   | 19.08234 | 19.08812 | 19.08342 | 19.13556 | 19.13005 | 19.13896 | 19.04649 | 19.05223 | 19.04848 | 19.08952 |
| Drought-12 h  | 19.30934 | 19.33384 | 19.35337 | 19.22032 | 19.22649 | 19.22001 | 19.30616 | 19.28447 | 19.29465 | 19.28318 |
| OE            | 18.97692 | 18.91269 | 18.93395 | 19.11363 | 19.13446 | 19.13767 | 18.90003 | 18.90663 | 18.91788 | 18.99265 |
| EV            | 19.25135 | 19.18048 | 19.20420 | 19.22323 | 19.23116 | 19.26486 | 19.15626 | 19.15216 | 19.15249 | 19.20180 |
| RNAi          | 19.33586 | 19.28745 | 19.25029 | 19.36229 | 19.33469 | 19.32774 | 19.10265 | 19.10488 | 19.10983 | 19.24619 |

$$\text{Max}_{Cq} - \text{Min}_{Cq} < 0.5$$

**Figure S3.** The analysis of Cq value about *β-actin* gene what is stably expressed in our material.

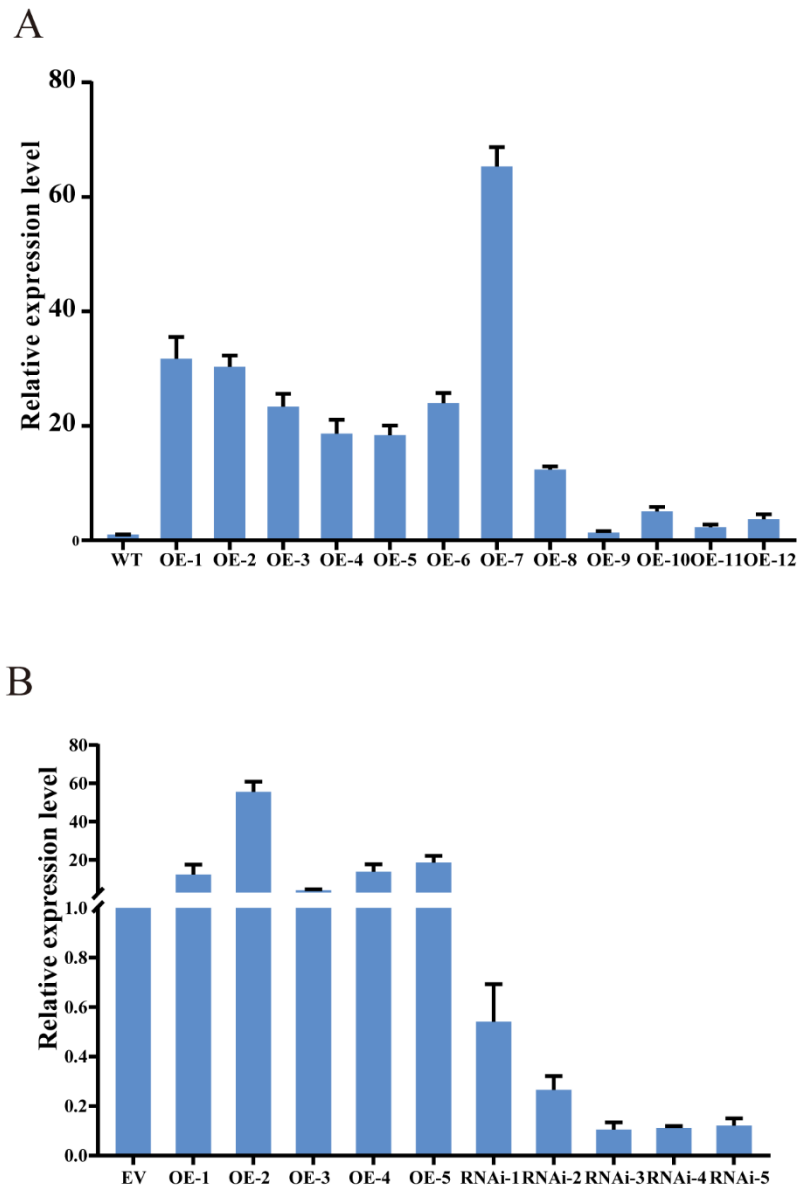

**Figure S4.** To confirmed relative expression level of *GmCBP60A-1* in transgenic *Arabidopsis* (A) and the hairy root soybean plants (B).
